# Supplementary material for: Involvement of the Eukaryote-Like Kinase-Phosphatase System and a Protein That Interacts with Penicillin-Binding Protein 5 in Emergence of Cephalosporin Resistance in Cephalosporin-Sensitive Class A Penicillin-Binding Protein Mutants in Enterococcus faecium
Source: PubMed Central journal article supplement — mBio. 2016 Apr 5;7(2):e02188-15. doi: 10.1128/mBio.02188-15 (PMC4959515; doi:10.1128/mbio.02188-15), 2016-04-05
Supplement: mbo001162724sf1a.pdf [file mbo001162724sf1a.pdf]

# Supplemental Figure 1A.

## stk protein sequences from CV598 and CRO1

CV598 MIELGKKLNGRYQITGNIGSGGMANVFLAHDLILDRDVAVKVLRFDQNDQTAIRRFQREALAATELVHPNIVSVYDVGEEDNMQYLVMEYVKGMDLKRYIQTHYPVPYETAVNI  
CRO1 MIELGKKLNGRYQITGNIGSGGMANVFLAHDLILDRDVAVKVLRFDQNDQTAIRRFQREALAATELVHPNIVSVYDVGEEDNMQYLVMEYVKGMDLKRYIQTHYPVPYETAVNI

CV598 MQQILSAISLAHNNHQIHRDLKPQNVLIDNEGVVKITDFGIAIALSET**SITQNT**MLGSVHYLSPEQARGSMATKQSDIYALGIILYEMLTGSVPPFDGESAVTIALKHFQDDLPSIKALD  
CRO1 MQQILSAISLAHNNHQIHRDLKPQNVLIDNEGVVKITDFGIAIALSET**SITQNT**MLGSVHYLSPEQARGSMATKQSDIYALGIILYEMLTGSVPPFDGESAVTIALKHFQDDLPSIKALD

CV598 **PNVPQALENVILRATAKEPADRYKSAE** EMSDDLSTVLSPARANEKQPHVMDNETKVITPLTEDAPMPDTFKSMPLPKDKPENETLPEEEEVLPDPKKGQKKWW**LILLAILAVL**  
CRO1 **PNVPQALENVILRATAKEPADRYKSAE** EMSDDLSTVLSPARANEKQPHVMDNETKVITPLTEDAPMPDTFKSMPLPKDKPENETLPEEEEVLPDPKKGQKKWW**LILLAILAVL**

CV598 **GIGTA**VFFASGGRGE**VVVPDVSDLSEASARETLAKAKLEVATKTEEIADDKIEEGNVVKTDPAAAGTTVKQKREVTLYIS**SGTKKI **KLDDYSGKSYEDAEASLKELGFSADLIQKEEFSEV**  
CRO1 **GIGTA**VFFASGGRGE**VVVPDVSDLSEASARETLAKAKLEVATKTEEIADDKIEEGNVVKTDPAAAGTTVKQKREVTLYIS**SGTKKI **KLDDYSGKSYEDAEASLKELGFSADLIQKEEFSEV**

CV598 **ESGMIISQSPSEDTEVDPKTDITFTVSK** GPETVTLSSH **VGENYETVRNWLVTQGFNINNISATYDYSDTVPSGSIISQDPASGEVVAEETYINFVVSQ** GTEPKL **NDISGYTKSEAQSYL**  
CRO1 **ESGMIISQSPSEDTEVDPKTDITFTVSK** GPETVTLSSH **VGENYETVRNWLVTQGFNINNISATYDYSDTVPSGSIISQDPASGEVVAEETYINFVVSQ** GTEPKL **NDISGYTKSEAQSYL**

CV598 **ASVGAEYIGHETSEYSNTVDKDKVIRTPGAGTTITKGMVVNVIYSK** GPDPASSSE **KDSSDSSSSSSSSSTSNSSKESSSSTSSSASTSESK.**  
CRO1 **ASVGAEYIGHETSEYSNTVDKDKVIRTPGAGTTITKGMVVNVIYSK** GPDPASSSE.

Ser/Thr kinase domain

**T: Threonines that are predicted to be auto-phosphorylated in *E. faecalis* and important to regulation of activity**

PASTA domain

Transmembrane helix

**Missing in CRO mutant, predicted to be disordered**
