# Supplementary figures and images for: Involvement of the Eukaryote-Like Kinase-Phosphatase System and a Protein That Interacts with Penicillin-Binding Protein 5 in Emergence of Cephalosporin Resistance in Cephalosporin-Sensitive Class A Penicillin-Binding Protein Mutants in Enterococcus faecium
Source: PubMed Central journal article supplement — mBio. 2016 Apr 5;7(2):e02188-15. doi: 10.1128/mBio.02188-15 (PMC4959515; doi:10.1128/mbio.02188-15), 2016-04-05

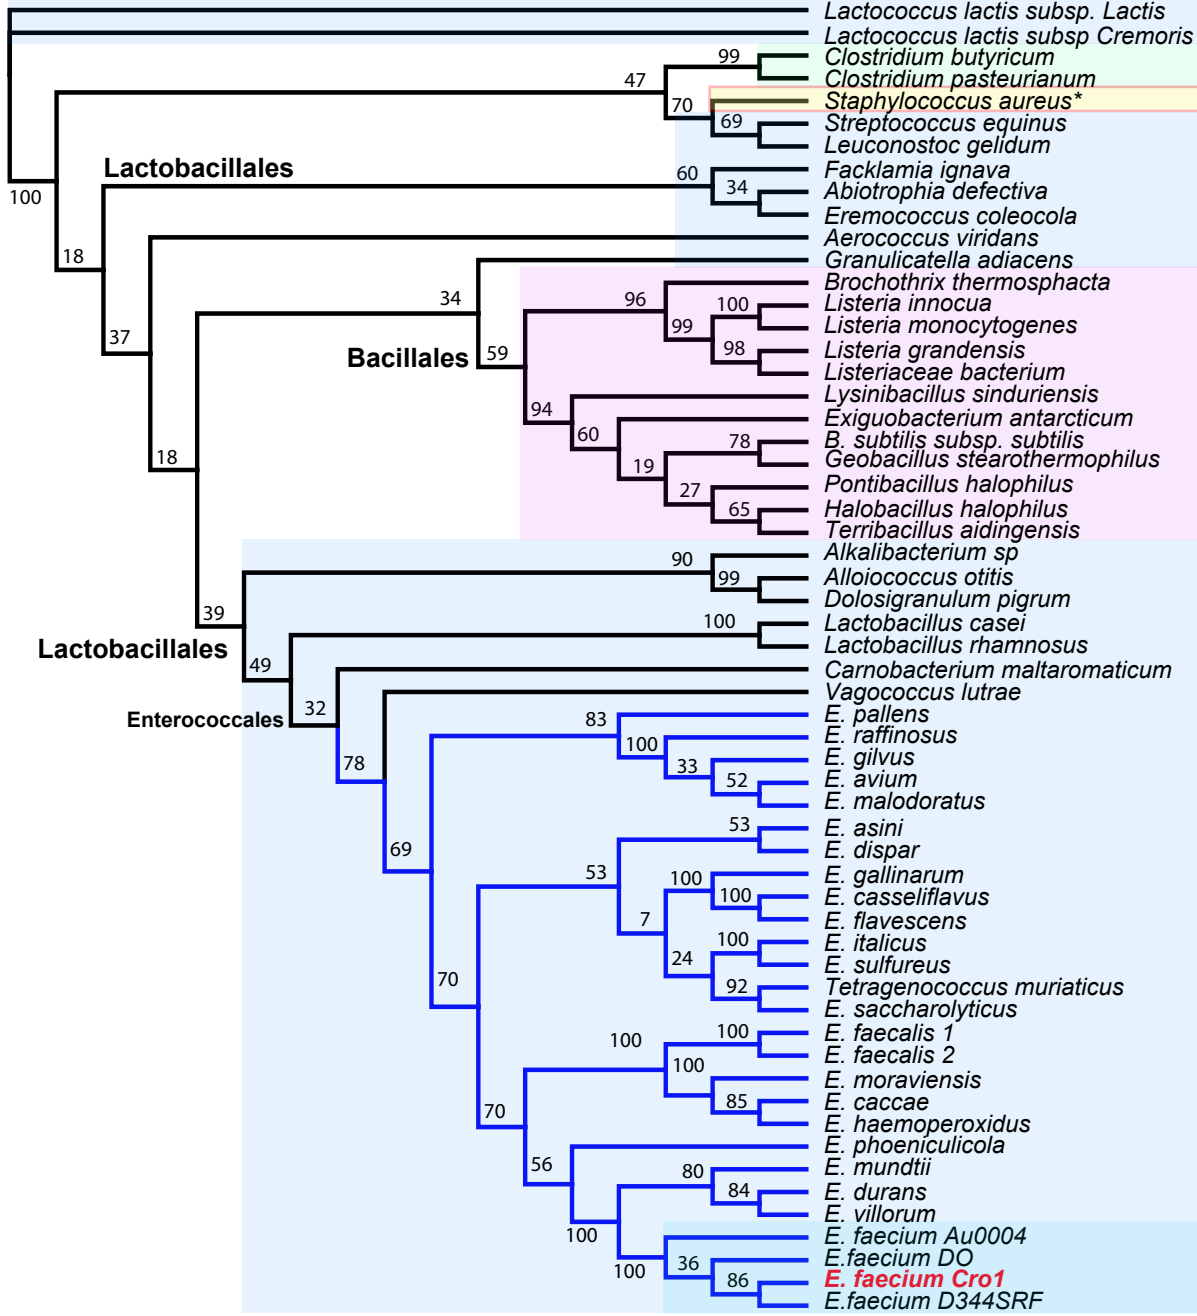

Supplement: mbo001162724sf3.pdf [file mbo001162724sf3.pdf]
